# Supplementary material for: Ants of the Palouse Prairie: diversity and species composition in an endangered grassland
Source: Biodivers Data J. 2021 May 10;9:e65768. doi: 10.3897/BDJ.9.e65768 (PMC8128849; doi:10.3897/BDJ.9.e65768)
Supplement: Supplementary material 2 — Figures 3 and 4 metadata [file bdj-09-e65768-s002.csv]

code	site	adjacent.habitat	pitfall.number	total.ants	Tetramorium immigrans	Tapinoma sessile	Temnothorax rugatulus	Formica lasiodes	Formica neogagates	Camponotus vicinus	Solenopsis molestra	Formica obscuripes	Formica puberula	Brachymyrmex depilis	Brachymyrmex deplis mycrogyna	Formica neoclara	Prenolepis imparis	Temnothorax nevadensis	Formica subanescens	Formica argentea	Aphaenogaster occidentalis	Lasius americanus
Skin-1	Skinner Preserve	Ag	1	4	0	0	3	0	0	0	0	0	0	0	0	0	0	0	0	0	1	0
Skin-2	Skinner Preserve	Ag	2	1	0	0	0	0	0	0	0	0	0	0	0	0	0	0	0	1	0	0
Skin-3	Skinner Preserve	Ag	3	0	0	0	0	0	0	0	0	0	0	0	0	0	0	0	0	0	0	0
Skin-4	Skinner Preserve	Ag	4	1	1	0	0	0	0	0	0	0	0	0	0	0	0	0	0	0	0	0
Skin-5	Skinner Preserve	Ag	5	0	0	0	0	0	0	0	0	0	0	0	0	0	0	0	0	0	0	0
Skin-6	Skinner Preserve	Ag	6	0	0	0	0	0	0	0	0	0	0	0	0	0	0	0	0	0	0	0
Skin-7	Skinner Preserve	Ag	7	4	3	1	0	0	0	0	0	0	0	0	0	0	0	0	0	0	0	0
Skin-8	Skinner Preserve	Ag	8	3	2	0	0	0	0	0	0	0	0	0	0	0	0	0	0	0	1	0
Skin-9	Skinner Preserve	Ag	9	4	2	2	0	0	0	0	0	0	0	0	0	0	0	0	0	0	0	0
Skin-10	Skinner Preserve	Ag	10	2	1	0	1	0	0	0	0	0	0	0	0	0	0	0	0	0	0	0
Skin-11	Skinner Preserve	Ag	11	3	1	0	0	1	0	0	0	0	0	0	0	0	0	0	0	1	0	0
Skin-12	Skinner Preserve	Ag	12	13	3	0	0	0	2	0	0	0	0	0	0	0	0	2	1	2	3	0
Skin-13	Skinner Preserve	Ag	13	1	1	0	0	0	0	0	0	0	0	0	0	0	0	0	0	0	0	0
Skin-14	Skinner Preserve	Ag	14	4	3	0	0	0	0	0	0	0	0	0	0	0	0	0	0	1	0	0
Skin-15	Skinner Preserve	Ag	15	11	4	0	2	0	0	0	0	0	0	0	0	0	0	0	0	5	0	0
Skin-16	Skinner Preserve	Ag	16	11	3	0	0	0	0	0	0	0	0	0	0	0	0	0	1	6	1	0
Skin-17	Skinner Preserve	Ag	17	15	3	0	2	0	2	0	0	0	0	0	0	0	0	0	1	5	2	0
Skin-18	Skinner Preserve	Ag	18	10	5	0	0	0	0	1	0	0	0	0	0	0	0	4	0	0	0	0
Skin-19	Skinner Preserve	Ag	19	4	1	0	0	0	2	0	0	0	0	0	0	0	0	0	0	1	0	0
Skin-20	Skinner Preserve	Ag	20	1	0	1	0	0	0	0	0	0	0	0	0	0	0	0	0	0	0	0
Skin-21	Skinner Preserve	Ag	21	2	0	0	0	0	0	0	0	0	0	0	0	0	0	0	0	0	0	2
Skin-22	Skinner Preserve	Ag	22	3	0	0	0	0	0	0	0	0	0	0	0	0	0	0	0	0	3	0
Skin-23	Skinner Preserve	Ag	23	3	0	0	0	0	0	0	0	0	0	0	0	0	0	0	0	0	3	0
Skin-24	Skinner Preserve	Ag	24	1	0	0	0	0	0	0	0	0	0	0	0	0	0	1	0	0	0	0
Skin-25	Skinner Preserve	Ag	25	1	0	1	0	0	0	0	0	0	0	0	0	0	0	0	0	0	0	0
Skin-26	Skinner Preserve	Ag	26	1	0	0	0	0	0	0	0	0	0	0	0	0	0	1	0	0	0	0
Skin-27	Skinner Preserve	Ag	27	4	0	0	0	0	1	0	0	0	0	0	0	0	0	0	1	0	2	0
Skin-28	Skinner Preserve	Ag	28	4	1	0	0	0	0	0	0	0	0	0	0	0	0	0	0	0	3	0
Skin-29	Skinner Preserve	Ag	29	1	0	1	0	0	0	0	0	0	0	0	0	0	0	0	0	0	0	0
Skin-30	Skinner Preserve	Ag	30	1	0	0	0	0	0	0	0	0	0	0	0	0	0	1	0	0	0	0
Skin-31	Skinner Preserve	Ag	31	11	0	0	0	0	3	0	0	0	5	0	0	0	0	0	0	2	1	0
Skin-32	Skinner Preserve	Ag	32	2	0	0	0	0	1	0	0	0	0	0	0	0	0	0	0	0	1	0
Skin-33	Skinner Preserve	Ag	33	1	0	1	0	0	0	0	0	0	0	0	0	0	0	0	0	0	0	0
Skin-34	Skinner Preserve	Ag	34	5	0	0	0	1	1	0	0	0	0	1	0	0	0	0	0	0	1	1
Skin-35	Skinner Preserve	Ag	35	9	0	0	0	3	0	0	0	0	0	0	0	0	0	0	0	1	5	0
Skin-36	Skinner Preserve	Ag	36	4	0	0	0	0	0	0	0	0	0	0	0	0	0	0	0	1	3	0
Skin-37	Skinner Preserve	Ag	37	11	0	0	0	2	0	0	0	0	0	0	0	0	0	0	0	2	7	0
Skin-38	Skinner Preserve	Ag	38	3	0	0	0	0	1	0	0	0	0	0	1	0	0	0	0	0	1	0
Skin-39	Skinner Preserve	Ag	39	10	0	0	0	7	1	0	0	0	0	0	0	0	1	0	0	0	1	0
Skin-40	Skinner Preserve	Ag	40	4	0	0	0	2	0	0	0	0	0	0	0	0	0	0	0	0	1	1
Phil-1	Philip's Farm	Forest	1	3	1	0	0	0	0	0	0	0	0	0	0	0	0	0	0	1	1	0
Phil-2	Philip's Farm	Forest	2	1	0	0	0	0	0	0	0	0	0	0	0	0	0	0	0	0	1	0
Phil-3	Philip's Farm	Forest	3	2	1	0	1	0	0	0	0	0	0	0	0	0	0	0	0	0	0	0
Phil-4	Philip's Farm	Forest	4	4	0	0	1	0	0	0	0	0	0	0	0	0	0	0	0	1	2	0
Phil-5	Philip's Farm	Forest	5	2	1	0	0	0	0	0	0	0	0	0	0	0	0	0	1	0	0	0
Phil-6	Philip's Farm	Forest	6	6	0	0	3	0	0	0	0	0	0	0	0	0	0	0	0	2	1	0
Phil-7	Philip's Farm	Forest	7	4	0	1	0	0	0	0	0	0	0	0	0	0	0	0	0	1	2	0
Phil-8	Philip's Farm	Forest	8	5	0	0	3	0	0	0	0	0	0	0	0	1	0	0	0	0	1	0
Phil-9	Philip's Farm	Forest	9	3	0	0	2	0	0	0	0	0	0	0	0	0	0	0	0	1	0	0
Phil-10	Philip's Farm	Forest	10	6	1	0	2	0	0	1	0	0	0	0	0	0	0	0	0	1	1	0
Idle-1	Idler's Rest	Forest	1	6	0	1	0	1	0	0	0	0	0	0	0	0	0	0	0	4	0	0
Idle-2	Idler's Rest	Forest	2	1	0	0	0	0	0	0	0	0	0	0	0	0	0	0	0	0	1	0
Idle-3	Idler's Rest	Forest	3	9	0	0	0	1	0	2	0	0	0	0	0	0	0	0	1	3	2	0
Idle-4	Idler's Rest	Forest	4	11	0	0	4	0	0	1	0	0	0	1	0	0	0	0	0	2	3	0
Idle-5	Idler's Rest	Forest	5	7	0	0	0	0	0	3	0	0	0	1	0	0	0	0	0	0	3	0
Idle-6	Idler's Rest	Forest	6	5	0	0	0	0	0	3	0	0	0	1	0	0	0	0	0	0	1	0
Idle-7	Idler's Rest	Forest	7	3	0	0	0	0	0	1	0	0	0	1	0	0	0	0	0	0	1	0
Idle-8	Idler's Rest	Forest	8	7	0	0	1	0	3	2	0	0	0	0	0	0	0	0	0	0	1	0
Idle-9	Idler's Rest	Forest	9	6	0	0	0	0	0	1	0	0	0	1	0	0	0	0	0	1	3	0
Idle-10	Idler's Rest	Forest	10	7	0	0	0	0	3	0	0	0	0	0	0	0	0	0	0	3	1	0
Smoo-1	Smoot Hill	Ag	1	0	0	0	0	0	0	0	0	0	0	0	0	0	0	0	0	0	0	0
Smoo-2	Smoot Hill	Ag	2	0	0	0	0	0	0	0	0	0	0	0	0	0	0	0	0	0	0	0
Smoo-3	Smoot Hill	Ag	3	0	0	0	0	0	0	0	0	0	0	0	0	0	0	0	0	0	0	0
Smoo-4	Smoot Hill	Ag	4	2	0	0	0	0	0	0	0	0	0	2	0	0	0	0	0	0	0	0
Smoo-5	Smoot Hill	Ag	5	0	0	0	0	0	0	0	0	0	0	0	0	0	0	0	0	0	0	0
Smoo-6	Smoot Hill	Ag	6	0	0	0	0	0	0	0	0	0	0	0	0	0	0	0	0	0	0	0
Smoo-7	Smoot Hill	Ag	7	1	0	1	0	0	0	0	0	0	0	0	0	0	0	0	0	0	0	0
Smoo-8	Smoot Hill	Ag	8	0	0	0	0	0	0	0	0	0	0	0	0	0	0	0	0	0	0	0
Smoo-9	Smoot Hill	Ag	9	4	0	3	0	0	0	0	1	0	0	0	0	0	0	0	0	0	0	0
Smoo-10	Smoot Hill	Ag	10	1	0	1	0	0	0	0	0	0	0	0	0	0	0	0	0	0	0	0
Smoo-11	Smoot Hill	Ag	11	0	0	0	0	0	0	0	0	0	0	0	0	0	0	0	0	0	0	0
Smoo-12	Smoot Hill	Ag	12	1	0	0	0	0	0	0	0	0	0	0	0	0	0	0	0	0	1	0
Smoo-13	Smoot Hill	Ag	13	0	0	0	0	0	0	0	0	0	0	0	0	0	0	0	0	0	0	0
Smoo-14	Smoot Hill	Ag	14	0	0	0	0	0	0	0	0	0	0	0	0	0	0	0	0	0	0	0
Smoo-15	Smoot Hill	Ag	15	0	0	0	0	0	0	0	0	0	0	0	0	0	0	0	0	0	0	0
Smoo-16	Smoot Hill	Ag	16	1	0	1	0	0	0	0	0	0	0	0	0	0	0	0	0	0	0	0
Smoo-17	Smoot Hill	Ag	17	0	0	0	0	0	0	0	0	0	0	0	0	0	0	0	0	0	0	0
Smoo-18	Smoot Hill	Ag	18	0	0	0	0	0	0	0	0	0	0	0	0	0	0	0	0	0	0	0
Smoo-19	Smoot Hill	Ag	19	1	0	0	0	0	0	0	0	0	0	1	0	0	0	0	0	0	0	0
Smoo-20	Smoot Hill	Ag	20	0	0	0	0	0	0	0	0	0	0	0	0	0	0	0	0	0	0	0
Kami-1	Kamiak Butte	Forest	1	1	0	0	0	0	0	0	0	0	0	0	0	0	0	0	0	0	1	0
Kami-2	Kamiak Butte	Forest	2	2	0	0	0	0	0	0	0	0	0	0	0	0	0	0	0	0	2	0
Kami-3	Kamiak Butte	Forest	3	1	0	0	0	0	0	0	0	0	0	0	0	0	0	0	0	0	1	0
Kami-4	Kamiak Butte	Forest	4	0	0	0	0	0	0	0	0	0	0	0	0	0	0	0	0	0	0	0
Kami-5	Kamiak Butte	Forest	5	0	0	0	0	0	0	0	0	0	0	0	0	0	0	0	0	0	0	0
Kami-6	Kamiak Butte	Forest	6	4	0	0	0	0	0	0	0	0	0	0	0	0	0	0	0	0	4	0
Kami-7	Kamiak Butte	Forest	7	0	0	0	0	0	0	0	0	0	0	0	0	0	0	0	0	0	0	0
Kami-8	Kamiak Butte	Forest	8	4	0	0	0	0	0	0	0	0	0	0	0	0	0	0	0	0	4	0
Kami-9	Kamiak Butte	Forest	9	2	0	0	0	0	0	0	0	0	0	0	0	0	0	0	0	0	1	1
Kami-10	Kamiak Butte	Forest	10	3	0	0	0	0	0	0	0	0	0	0	0	0	0	2	0	0	1	0
Kami-11	Kamiak Butte	Forest	11	5	0	0	0	0	0	1	0	0	0	0	0	0	0	0	0	0	4	0
Kami-12	Kamiak Butte	Forest	12	4	0	0	0	0	0	0	0	0	0	1	0	0	0	0	0	0	3	0
Kami-13	Kamiak Butte	Forest	13	3	0	0	0	0	0	0	0	0	0	0	0	0	0	1	0	0	2	0
Kami-14	Kamiak Butte	Forest	14	1	0	0	0	0	0	0	0	0	0	1	0	0	0	0	0	0	0	0
Kami-15	Kamiak Butte	Forest	15	0	0	0	0	0	0	0	0	0	0	0	0	0	0	0	0	0	0	0
Kami-16	Kamiak Butte	Forest	16	1	0	0	0	0	0	0	0	0	0	0	0	0	0	0	0	0	1	0
Kami-17	Kamiak Butte	Forest	17	1	0	0	0	0	0	0	0	0	0	0	0	0	0	0	0	0	0	1
Kami-18	Kamiak Butte	Forest	18	2	0	0	0	0	0	0	0	0	0	0	0	0	0	0	0	0	0	2
Kami-19	Kamiak Butte	Forest	19	1	0	0	0	0	0	0	0	0	0	0	0	0	0	0	0	0	1	0
Kami-20	Kamiak Butte	Forest	20	0	0	0	0	0	0	0	0	0	0	0	0	0	0	0	0	0	0	0
Kami-21	Kamiak Butte	Forest	21	6	0	0	2	1	0	0	0	0	0	0	0	0	0	0	0	2	1	0
Kami-22	Kamiak Butte	Forest	22	2	0	0	1	0	0	0	0	0	0	0	0	0	0	0	0	0	0	1
Kami-23	Kamiak Butte	Forest	23	3	0	0	1	0	0	0	0	0	0	0	0	0	0	0	0	1	1	0
Kami-24	Kamiak Butte	Forest	24	3	0	0	0	0	0	0	0	0	0	0	0	0	0	1	0	0	2	0
Kami-25	Kamiak Butte	Forest	25	12	0	0	1	0	0	0	0	0	0	0	0	0	0	0	0	0	3	8
Kami-26	Kamiak Butte	Forest	26	3	0	0	0	0	0	0	0	0	0	0	0	0	0	0	0	1	0	2
Kami-27	Kamiak Butte	Forest	27	2	0	0	0	0	1	0	0	0	0	0	0	0	0	0	0	1	0	0
Kami-28	Kamiak Butte	Forest	28	7	0	0	0	1	0	0	0	0	0	0	0	0	0	0	0	2	2	2
Kami-29	Kamiak Butte	Forest	29	1	0	0	0	0	0	0	0	0	0	0	0	0	0	0	0	1	0	0
Kami-30	Kamiak Butte	Forest	30	5	0	0	0	0	0	0	0	0	0	0	0	0	0	1	0	1	2	1
Kami-31	Kamiak Butte	Forest	31	3	0	0	0	1	0	0	0	0	0	0	0	0	0	2	0	0	0	0
Kami-32	Kamiak Butte	Forest	32	4	0	0	0	4	0	0	0	0	0	0	0	0	0	0	0	0	0	0
Kami-33	Kamiak Butte	Forest	33	4	0	0	0	2	0	0	0	0	0	0	0	0	0	0	0	0	2	0
Kami-34	Kamiak Butte	Forest	34	0	0	0	0	0	0	0	0	0	0	0	0	0	0	0	0	0	0	0
Kami-35	Kamiak Butte	Forest	35	1	0	0	0	0	0	0	0	0	0	1	0	0	0	0	0	0	0	0
Kami-36	Kamiak Butte	Forest	36	2	0	0	0	0	0	0	0	0	0	0	0	0	0	0	1	1	0	0
Kami-37	Kamiak Butte	Forest	37	0	0	0	0	0	0	0	0	0	0	0	0	0	0	0	0	0	0	0
Kami-38	Kamiak Butte	Forest	38	1	0	0	0	0	0	0	0	0	0	0	0	0	0	0	0	0	1	0
Kami-39	Kamiak Butte	Forest	39	1	0	0	0	0	0	0	0	0	0	0	0	0	0	0	0	1	0	0
Kami-40	Kamiak Butte	Forest	40	3	0	0	1	0	0	0	0	0	0	0	0	0	0	0	0	0	2	0
Kami-41	Kamiak Butte	Forest	41	0	0	0	0	0	0	0	0	0	0	0	0	0	0	0	0	0	0	0
Kami-42	Kamiak Butte	Forest	42	1	0	0	0	0	0	0	0	0	0	0	0	0	0	1	0	0	0	0
Kami-43	Kamiak Butte	Forest	43	4	0	0	0	0	0	1	0	0	0	1	0	0	0	0	0	0	1	1
Kami-44	Kamiak Butte	Forest	44	0	0	0	0	0	0	0	0	0	0	0	0	0	0	0	0	0	0	0
Kami-45	Kamiak Butte	Forest	45	2	0	0	1	0	0	0	0	0	0	0	0	0	0	0	0	0	1	0
Kami-46	Kamiak Butte	Forest	46	2	0	0	0	0	0	1	0	0	0	0	0	0	0	0	0	0	1	0
Kami-47	Kamiak Butte	Forest	47	4	0	0	0	0	0	0	0	0	0	0	0	0	0	0	0	1	3	0
Kami-48	Kamiak Butte	Forest	48	13	0	0	0	0	0	0	0	0	0	0	0	0	0	0	0	8	5	0
Kami-49	Kamiak Butte	Forest	49	4	0	0	2	0	0	1	0	0	0	0	0	0	0	0	0	1	0	0
Kami-50	Kamiak Butte	Forest	50	0	0	0	0	0	0	0	0	0	0	0	0	0	0	0	0	0	0	0
