# Supplementary material for: Ants of the Palouse Prairie: diversity and species composition in an endangered grassland
Source: Biodivers Data J. 2021 May 10;9:e65768. doi: 10.3897/BDJ.9.e65768 (PMC8128849; doi:10.3897/BDJ.9.e65768)
Supplement: Supplementary material 3 — Figure 5 metadata [file bdj-09-e65768-s003.csv]

Biome	Number of studies
Deserts & Xeric Shrublands	1
Mediterranean Forests, Woodlands & Scrub	3
Montane Grasslands & Shrublands	1
Temperate Broadleaf & Mixed Forest	3
Temperate Grasslands, Savannas & Shrublands	2
Tropical & Subtropical Coniferous Forests	1
Tropical & Subtropical Grasslands, Savannas & Shrublands	8
Tropical & Subtropical Moist Broadleaf Forests	2
